# Supplementary material
Source: PubMed Central journal article supplement (PMC3313469)
Supplement: NIHMS316879-supplement-01.pdf [file NIHMS316879-supplement-01.pdf]

# THE LANCET

## Supplementary webappendix

This webappendix formed part of the original submission and has been peer reviewed. We post it as supplied by the authors.

Supplement to: Greenberg ER, Anderson GL, Morgan DR, et al. 14-day triple, 5-day concomitant, and 10-day sequential therapies for *Helicobacter pylori* infection in seven Latin American sites: a randomised trial. *Lancet* 2011; published online July 20. DOI:10.1016/S0140-6736(11)60825-8.

**Table 5 (Supplement): Summary of *H. pylori* eradication by treatment arm and study centre for adherent population.**

| Treatment Regimen             | N  | Eradicated |         | Difference from Standard | Adjusted 95% CI | P-value for Interaction* |
|-------------------------------|----|------------|---------|--------------------------|-----------------|--------------------------|
|                               |    | N          | Percent |                          |                 |                          |
| <b>Study Site</b>             |    |            |         |                          |                 | 0.21                     |
| <b>Santiago, Chile</b>        |    |            |         |                          |                 |                          |
| Standard                      | 57 | 53         | 93.0%   |                          |                 |                          |
| Concomitant                   | 56 | 44         | 78.6%   | 14.4%                    | 0.0%, 28.9%     |                          |
| Sequential                    | 59 | 52         | 88.1%   | 4.8%                     | -9.0%, 18.7%    |                          |
| <b>Túquerres, Colombia</b>    |    |            |         |                          |                 |                          |
| Standard                      | 71 | 58         | 81.7%   |                          |                 |                          |
| Concomitant                   | 72 | 58         | 80.6%   | 1.1%                     | -13.5%, 15.8%   |                          |
| Sequential                    | 67 | 53         | 79.1%   | 2.6%                     | -14.0%, 19.2%   |                          |
| <b>Guanacaste, Costa Rica</b> |    |            |         |                          |                 |                          |
| Standard                      | 67 | 59         | 88.1%   |                          |                 |                          |
| Concomitant                   | 65 | 50         | 76.9%   | 11.1%                    | -3.6%, 25.8%    |                          |
| Sequential                    | 64 | 59         | 92.2%   | -4.1%                    | -17.3%, 9.0%    |                          |
| <b>Copán, Honduras</b>        |    |            |         |                          |                 |                          |
| Standard                      | 66 | 63         | 95.5%   |                          |                 |                          |
| Concomitant                   | 69 | 60         | 87.0%   | 8.5%                     | -2.3% , 19.3%   |                          |
| Sequential                    | 70 | 58         | 82.9%   | 12.6%                    | -0.5% , 25.7%   |                          |
| <b>Tapachula, México</b>      |    |            |         |                          |                 |                          |
| Standard                      | 59 | 51         | 86.4%   |                          |                 |                          |
| Concomitant                   | 65 | 50         | 76.9%   | 9.5%                     | -5.9%, 24.9%    |                          |
| Sequential                    | 65 | 47         | 72.3%   | 14.1%                    | -3.4%, 31.7%    |                          |
| <b>Ciudad Obregón, México</b> |    |            |         |                          |                 |                          |
| Standard                      | 58 | 51         | 87.9%   |                          |                 |                          |
| Concomitant                   | 63 | 45         | 71.4%   | 16.5%                    | 0.5%, 32.5%     |                          |
| Sequential                    | 59 | 45         | 76.3%   | 11.7%                    | -5.7%, 29.1%    |                          |
| <b>León, Nicaragua</b>        |    |            |         |                          |                 |                          |
| Standard                      | 56 | 43         | 76.8%   |                          |                 |                          |
| Concomitant                   | 52 | 41         | 78.8%   | -2.1%                    | -20.0%, 15.9%   |                          |
| Sequential                    | 54 | 41         | 75.9%   | 0.9%                     | -18.2%, 19.9%   |                          |

\*P-value for Chi-squared drop-in-deviance test for significance of interaction with treatment regimen in a logistic regression model controlling for main effects of treatment and baseline covariate
